# Supplementary material for: Surface-Engineered TiO2 for High-Performance Flexible Supercapacitor Applications
Source: Springer Nature journal article supplement (doi:10.1007/s11664-022-10084-0), 2022-12-04
Supplement: MOESM1 [file 23788508]

## **Surface Engineered TiO<sub>2</sub> for high performance flexible supercapacitor applications**

*Abdelnaby M. Elshahawy*<sup>1\*</sup>, *Saeid M. Elkatlawy*<sup>2</sup>, *Mustafa S. Shalaby*<sup>3</sup>, *Cao Guan*<sup>4</sup>, and *John Wang*<sup>5</sup>

<sup>1</sup> Physics Department, Faculty of Science, Assiut University, Assiut 71516, Egypt

<sup>2</sup> Department of Physics, Faculty of Science, Damanhour University, 22111 Damanhour, Egypt.

<sup>3</sup> Solid State Physics and Accelerators department, National Center for Radiation Research and Technology, Egyptian Atomic Energy Authority, Cairo, Egypt

<sup>4</sup> Frontiers Science Center for Flexible Electronics, Institute of Flexible Electronics, Northwestern Polytechnical University, Xi'an 710072, P. R. China

<sup>5</sup> Department of Materials Science and Engineering, National University of Singapore, 9 Engineering Drive 1, Singapore 117575, Singapore.

\*Address correspondence to [a.elshahawy@science.aun.edu.eg](mailto:a.elshahawy@science.aun.edu.eg).

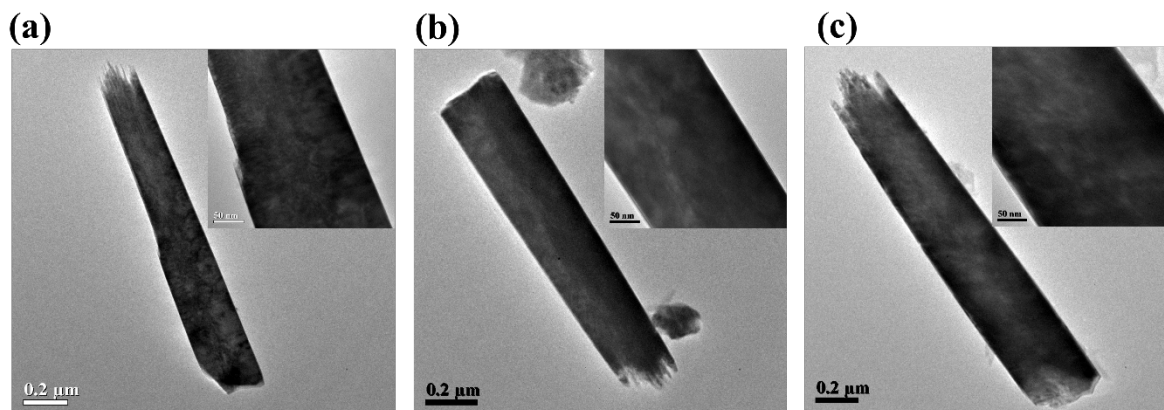

**Figure S1:** TEM images of (a) TiO<sub>2</sub> with Tape Under N<sub>2</sub>, (b) TiO<sub>2</sub> without Tape Under Air, (c) TiO<sub>2</sub> with Tape under Air

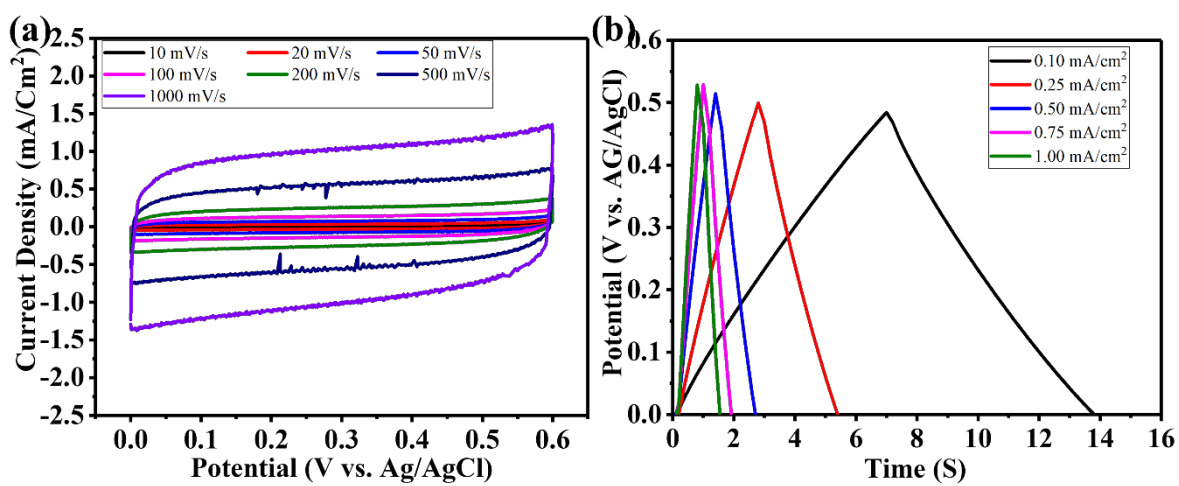

**Figure S2:** (a) Cyclic Voltammometry Curves at different scan rate, and (b) Charge and Discharge curves at different current densities of TiO<sub>2</sub> with Tape under N<sub>2</sub>.

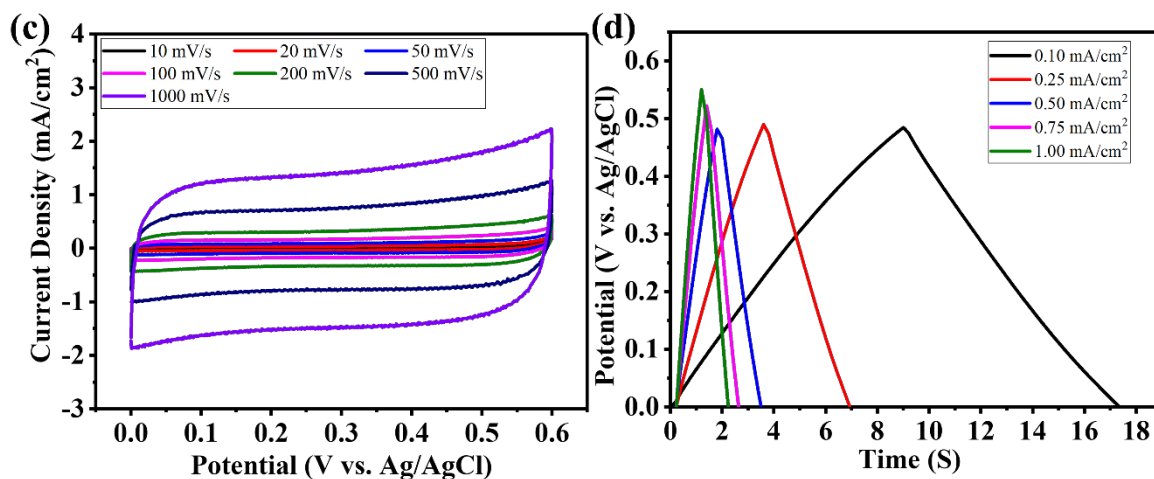

**Figure S3:** (a) Cyclic Voltammetry Curves at different scan rate, and (b) Charge and Discharge curves at different current densities of TiO<sub>2</sub> with Tape before annealing.

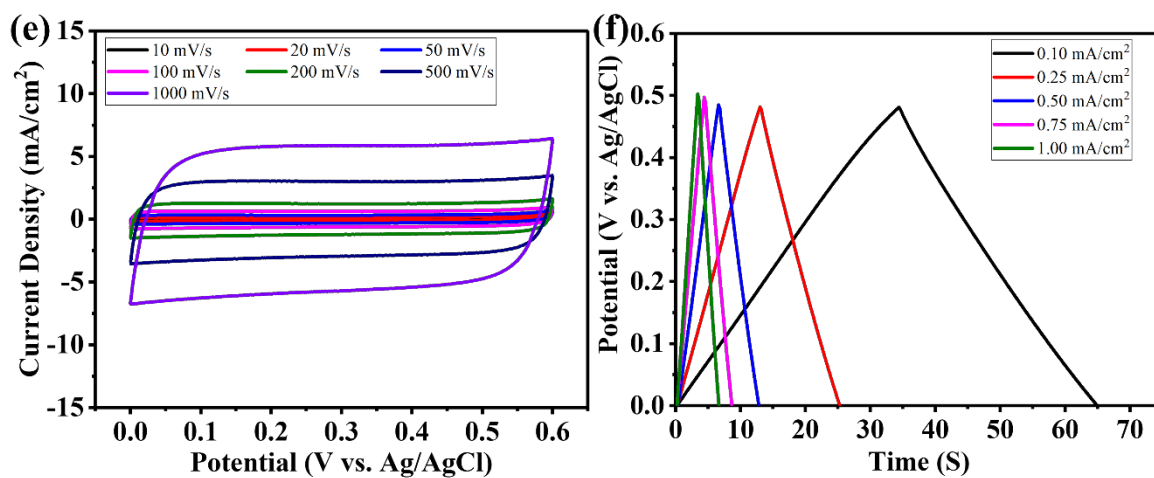

**Figure S4:** (a) Cyclic Voltammetry Curves at different scan rate, and (b) Charge and Discharge curves at different current densities of TiO<sub>2</sub> without Tape under air.
